# Supplementary material for: Singular Value Decomposition and Ligand Binding Analysis
Source: Hindawi journal article supplement (doi:10.1155/2013/372596), 2013-01-01
Supplement: f1 [file 372596.f1.pdf]

# Supplementary Material - Singular Value Decomposition (SVD) and Ligand Binding Analysis

André Luiz Galo and Márcio Francisco Colombo

## MatLab<sup>®</sup> scripts

### a) Input Data format

$$\text{data.dat} = \begin{pmatrix} ND & [DNA]_1 & [DNA]_2 & \cdots & [DNA]_n \\ ND & [ligand]_1 & [ligand]_2 & \cdots & [ligand]_n \\ \lambda_1 & A_{11} & A_{12} & \cdots & A_{1n} \\ \lambda_2 & A_{21} & A_{22} & \cdots & A_{2n} \\ \vdots & \vdots & \vdots & \ddots & \vdots \\ \lambda_m & A_{m1} & A_{m1} & \cdots & A_{mn} \end{pmatrix}$$

were  $ND$  values are not defined (blank),  $[DNA]_n$  e  $[ligand]_n$  are DNA and ligand concentration, respectively, for n-th titration.

### b) Main script

```
1. load data.dat
2. [m,n] = size(data);
3. DNA = data(1,2:n);
4. Lt = data(2,2:n);
5. lb = Data(3:m,1);
6. abs = Data(3:m,2:n);
7. plot(lb,abs) % absorbance plot view
8. pause
9. x = abs;
10. [m,n] = size(x);
11. r = min(m-1,n);
12. avg = mean(x);
13. avgx=avg(ones(m,1),:);
14. absnorm = (x - avgx); clear x
15. [U,S,V] = svd(absnorm,0); % SVD compute
16. variances=diag(S).^2;
17. percent_explained = 100*variances/sum(variances);
18. peso=percent_explained(1:4) % weight of first four components
```

```

19. %% Plots for define the matrix rank %%
20. plot(lb,U(:,1:3)) % plot the first three U components
21. plot(log10(concActd),V(:,1:3),'!') % plot the first three V components
22. plot(lb,absnorm*V(:,1:3))
23. %% Non-linear fitting - Input initial parameters %%
24. nc = 2 % nc = number of significative principal components
25. K1 = 5.1 ; ns1 = 8 ;
26. K2 = 6.8 ; ns2 = 60; % 10^K1 and 10^K2 are binding constants;
27. % ns1 e ns2 are number of occupied sites
28. nsk1=-log10(ns1)+K1; % input parameters are ns1*K1 and ns2*K2
29. nsk2=-log10(ns2)+K2; % This give more stability
30. par=[K1 nsk1 K2 nsk2];
31. ajusteScatchard % call ajusteScatchard script and return plots
32. %% View parameters fitting and Scatchard plot %%
33. par_K=[10^par(1) 10^par(3)] % display k1 and k2
34. par_n=[10^(par(1)-par(2)) 10^(par(3)-par(4))] % display n1 and n2
35. plot(L_bound./DNA,L_bound./DNA./L_free,'o-') % display Scatchard plot

```

### c) ajustScatchard script

```

1. par = lsqnonlin(@errVscatchard,par,[],[],[],Lt, DNA, nc, U, S, V, absnorm)
2. if max(size(par))==2
3.     ns1 = 10^par(1)/10^par(2)
4. else
5.     ns1 = 10^par(1)/10^par(2)
6.     ns2 = 10^par(3)/10^par(4)
7. end
8. pause % pause – return computed value
9. % after lsqnonlin converging – return F matrix
10. %% compute F matrix %%
11. m = max(size(Lt)); par
12. L_free = zeros(size(Lt));
13. L_f=0.25*Lt(1); % Initial condition (titration) – most of binding are bound
14. % then, we start with [ligand free] = 0,25*[ligand total]
15. for i=1:m
16.     L_f=fzero(@LfScatchard,L_f,optimset('fzero'),par, DNA(i),Lt(i));
17.     L_free(i)=L_f;
18. end % recursively calls LfScatchard

```

```

19.                                     % and compute the concentrations by Scatchard model
20. L_bound = calculo_bound(par, DNA, L_free);
21.     if nc==1
22.         F=[L_free]; ni=L_bound./DNA; niL=ni./L_free;
23.     end
24.     if nc==2
25.         if max(size(par))==4
26.             L_bound=L_bound(:,1)+L_bound(:,2);
27.         end
28.         F=[L_free L_bound]; ni=L_bound./DNA; niL=ni./L_free;
29.     end
30.     if nc==3
31.         F=[L_free L_bound];
32.         ni=(Lt-L_free)./DNA; niL=ni./L_free;
33.         ni1=F(:,2)./DNA; ni2=F(:,2)./DNA;
34.     end
35.     %% Vfit (concentrations), Dfit e absfit compute %%
36.     H = V(:,1:nc)*pinv(F'); err=V(:,1:nc)-H*F'; fitV=H*F';
37.     plot(log10(Lt),fitV,log10(Lt),V(:,1:nc),'!')           % comparison plot: V e Vfit versus Lt
38.     xlabel('[Lt]')
39.     ylabel('V')
40.     pause                                                  % pause, press any key to continue
41.     plot(log10(DNA),fitV,log10(DNA),V(:,1:nc),'!')       % comparison plot: V e Vfit versus DNA
42.     xlabel('[DNA]')
43.     ylabel('V')
44.     pause
45.     plot(log10(L_free), L_bound, '-o')                    % ligand free versus ligand bound
46.     ylabel('L_bound')
47.     xlabel('Lt')
48.     pause
49.     Dfit=(avgx+U(:,1:nc)*S(1:nc,1:nc)*V(:,1:nc)')*pinv(F')/10; % recalculated spectra
50.     plot(lb,Dfit)                                         % warning: 10 is the optical pathway
51.     xlabel('nm')
52.     ylabel('Abs/mol/cm')
53.     pause
54.     absfit = U(:,1:nc)*S(1:nc,1:nc)*H*F';
55.     plot(lb,absnorm-absfit)                               % residual plot
56.     xlabel('nm')

```

```

57. ylabel('Abs_experimental - Abs_fit')
58. pause
59. erro = [norm(absnorm-absfit) norm(err)]           % errors

```

#### d) errVscatchard function

```

1. %% Errors of Scatchard parameters %%
2. function err = errVscatchard(par, Lt, DNA, nc, U, S, V, absnorm);
3. m = max(size(Lt)); par;
4. L_free = zeros(size(Lt));
5. L_f=Lt(1);
6. for i=1:m
7.     L_f=fzero(@LfScatchard,L_f,optimset('fzero'),par, DNA(i),Lt(i));
8.     L_free(i)=L_f;
9. end
10. %% Bound ligand concentration %%
11. L_bound = calculo_bound(par, DNA, L_free);           % call calculo_bound
12.                                                     % compute F = [L_free L_bound] matrix
13. if nc==1
14.     F=[L_free];
15. end
16. if nc==2
17.     if max(size(par))==4
18.         L_bound=L_bound(:,1)+L_bound(:,2);
19.     end
20.     F=[L_free L_bound];
21. end
22. if nc==3
23.     F=[L_free L_bound(:,1) L_bound(:,2)];
24. End
25. H = V(:,1:nc)'\*pinv(F');
26. err=S(1:nc,1:nc)*(V(:,1:nc)'\-H*F');           % value used by lsqnonlin

```

#### e) LfScatchard function

```

1. function y = LfScatchard(x, par, DNA, L)
2.     if max(size(par))==2           % one site model
3.         K1=10^par(1);

```

```

4.     nsk1=10^par(2);
5.     y = -K1 * x^2 + (L*K1-1-DNA*nsk1) * x + L;
6.     else                                     % two site model
7.         K1=10^par(1);
8.         nsk1=10^par(2);
9.         K2=10^par(3);
10.        nsk2=10^par(4);
11.        y = -K1*K2 * x^3 + ((L*K1-1)*K2-K1-DNA*(nsk1*K2+nsk2*K1)) * x^2 + ...
12.        (L*K2+L*K1-1-DNA*(nsk1+nsk2)) * x + L;
13.    end

```

#### f) calculo\_bound function

```

1.    function L_bound = calculo_bound(par, DNA, L)
2.    UM=ones(size(L));
3.    if max(size(par))==2                       % one site
4.        K1=10^par(1);
5.        nsk1=10^par(2);
6.        L_bound = nsk1*L.*DNA./(UM+K1*L);
7.    else                                       % two site
8.        K1=10^par(1);
9.        nsk1=10^par(2);
10.       K2=10^par(3);
11.       nsk2=10^par(4);
12.       L_bound = [nsk1*L.*DNA./(UM+K1*L) nsk2*L.*DNA./(UM+K2*L)];
13.    end

```
